# Supplementary material
Source: publisher figshare collection journal article supplement (https://acs.figshare.com/ndownloader/files/4505494)
Supplement: Supplementary file 1 [file 4505494]

## Supporting Information

### Regioregular Poly(3-pentylthiophene): Synthesis, Self-Assembly of Nanowires, High-Mobility Field-Effect Transistors, and Efficient Photovoltaic Cells

Pei-Tzu Wu, Hao Xin, Felix Sunjoo Kim, Guoqiang Ren, Samson A. Jenekhe\*

Departments of Chemical Engineering and Chemistry, University of Washington, Seattle, Washington 98195-1750, USA

\* Author for all correspondence: [jenekhe@u.washington.edu](mailto:jenekhe@u.washington.edu)

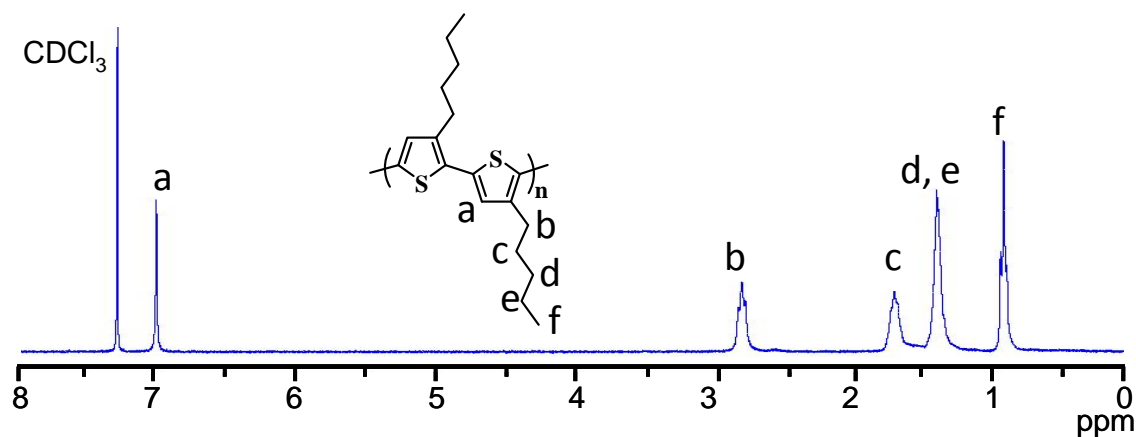

**Figure S1.** <sup>1</sup>H-NMR of Poly(3-pentylthiophene) in CDCl<sub>3</sub>.

<sup>1</sup>H NMR (300 MHz, CDCl<sub>3</sub>): δ 6.98 (s, 1H), 2.82 (t, 2H), 1.42 (m, 4H), 0.95 (t, 3H). Regioregularity of P3PT-1 is estimated to be 94.3%. The estimation of regioregularity is derived by integration of the methylene (α) protons: A/(A+B), the integral A (range: 2.95 – 2.65 ppm) and the integral B (range: 2.6625 – 2.50 ppm).

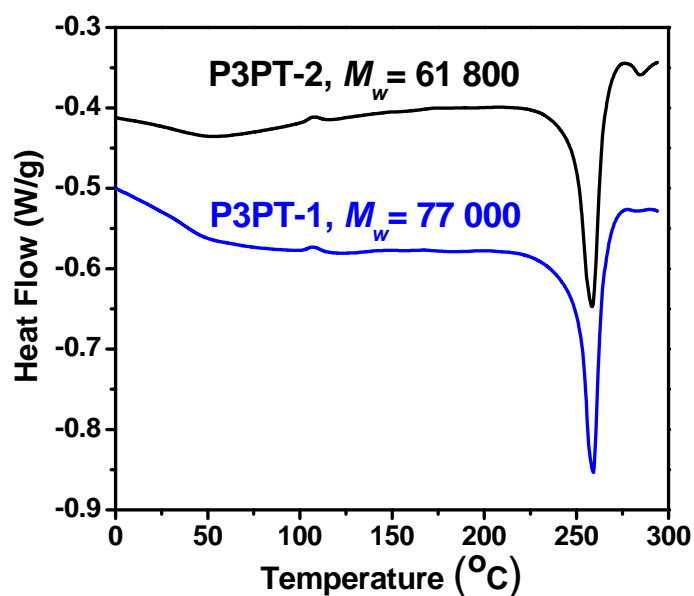

**Figure S2.** Thermal properties of P3PT samples. (A) The second heating scans of P3PT-1 and P3PT-2 at a heating rate of 10 °C/min. (B) The alkyl chain length dependence of the melting temperatures of regioregular poly(3-alkylthiophene)s for  $n = 4 - 12$ .

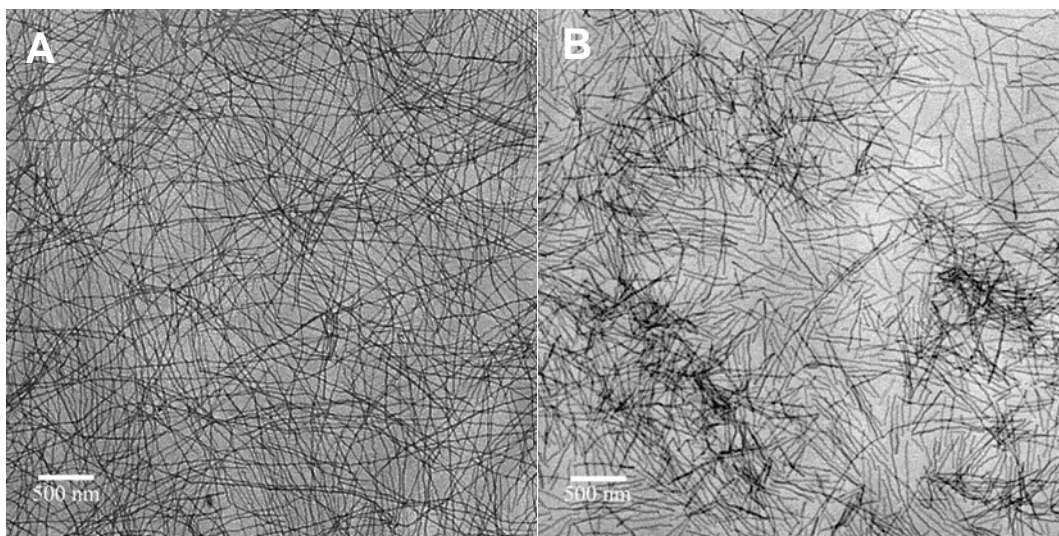

**Figure S3.** The morphology of P3PT-1e NWs characterized by TEM. (A) Self-assembled P3PT-1e NWs grown at 10 mg/mL. (B) Self-assembled P3PT-1e NWs grown at 20 mg/mL.

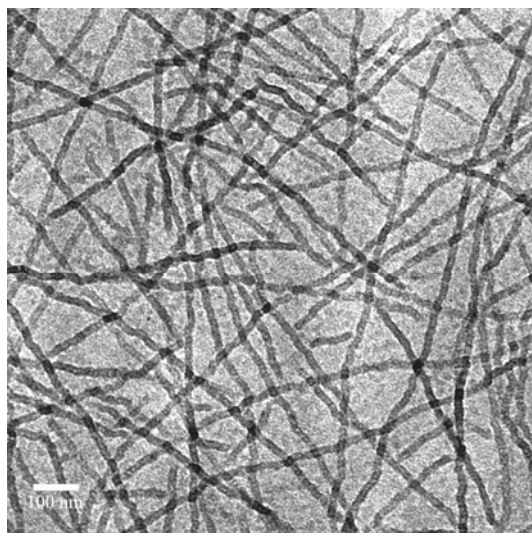

**Figure S4.** Self-assembled P3PT-1 NWs grown at 6 mg/mL and the pseudo-bicontinuous morphology of P3PT-1 NWs under TEM at 100 kV.

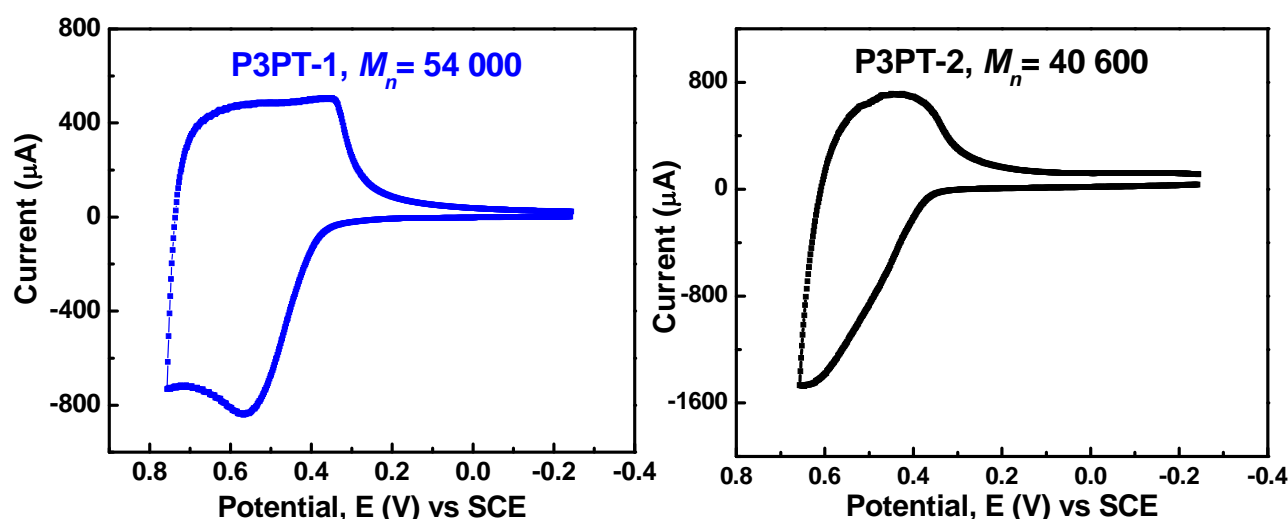

**Figure S5.** Cyclic voltammogram of P3PT: the oxidation scan of P3PT film on platinum wire in 0.1 M  $\text{Bu}_4\text{NPF}_6$  solution in acetonitrile at a scan rate of 50 mV/s. The onset of oxidation potential is estimated to be 0.38 V (vs SCE), corresponding to an ionization potential of 4.78 eV. Cyclic voltammetry experiments were done on an EG&G Princeton Applied Research Potentiostat/Galvanostat (Model 273A) using 0.1 M tetra-*n*-butylammonium hexafluorophosphate ( $\text{Bu}_4\text{NPF}_6$ ) in acetonitrile as electrolyte. A three-electrode cell was used in all experiments. Platinum wire electrodes were used as both counter and working electrodes and silver/silver ion (Ag in 0.1 M  $\text{AgNO}_3$  solution, Bioanalytical System, Inc.) was used as a reference electrode. The  $\text{Ag}/\text{Ag}^+$  ( $\text{AgNO}_3$ ) reference electrode was calibrated at the beginning of the experiments by running cyclic voltammetry on ferrocene as the internal standard. The potential values obtained in reference to  $\text{Ag}/\text{Ag}^+$  electrode were then converted to the saturated calomel electrode (SCE) scale. The films of the polymers were coated onto the working electrode by dipping a Pt wire into a 3 wt% solution in chloroform and chlorobenzene and drying under vacuum at 60 °C for 1 h.

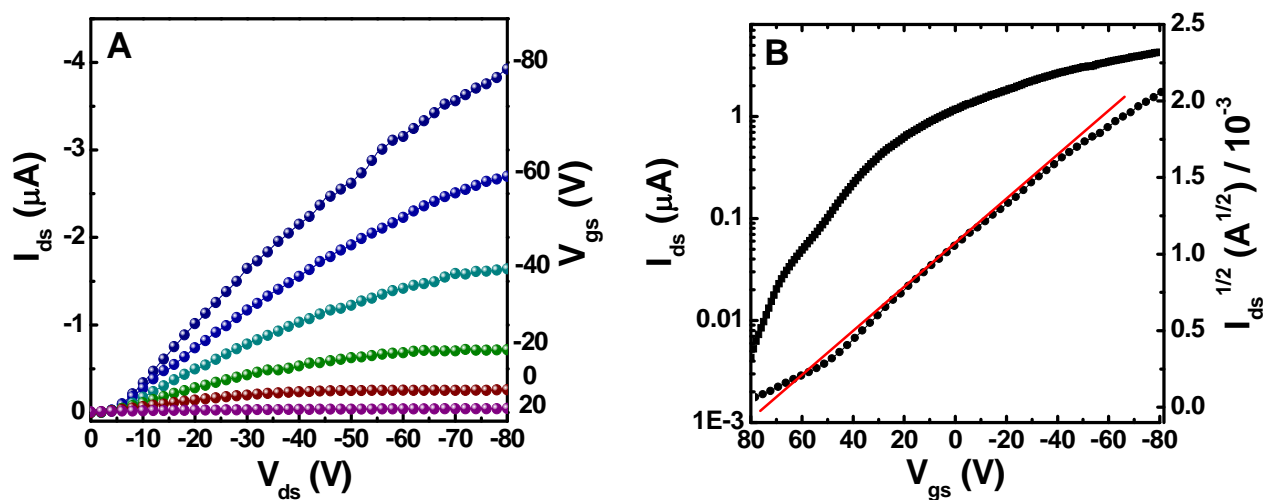

**Figure S6.** Output (A) and transfer (B) characteristics of one OFET based on P3PT-1:PC<sub>71</sub>BM (1:1) exhibiting a hole mobility of  $9.3 \times 10^{-4} \text{ cm}^2/\text{V s}$ .
